# Supplementary material
Source: publisher figshare collection journal article supplement (https://acs.figshare.com/ndownloader/files/13353584)
Supplement: Supplementary file 1 [file 13353584]

## Supporting Information

# Unconventional Shape Memory Mechanisms of Nanoporous Polymer Photonic Crystals: Implications for Nanooptical Coatings and Devices

*Yongliang Ni,<sup>†</sup> Yifan Zhang,<sup>†</sup> Sin-Yen Leo,<sup>‡</sup> Yin Fang,<sup>‡</sup> Mingzhen Zhao,<sup>§</sup> Long Yu,<sup>§</sup> Kyle D. Schulze,<sup>†</sup> Wallace G. Sawyer,<sup>†</sup> Thomas E. Angelini,<sup>†</sup> Peng Jiang<sup>\*‡</sup>, and Curtis R. Taylor<sup>\*†</sup>*

<sup>†</sup>Department of Mechanical and Aerospace Engineering, University of Florida, Gainesville, Florida 32611,

<sup>‡</sup>Department of Chemical Engineering, University of Florida, Gainesville, Florida 32611,

<sup>§</sup>Department of Material Science and Engineering, University of Florida, Gainesville, Florida 32611.

---

\* Corresponding author. E-mail: [pjiang@che.ufl.edu](mailto:pjiang@che.ufl.edu), [curtis.taylor@ufl.edu](mailto:curtis.taylor@ufl.edu)

The elastic moduli as a function of polymer compositions were measured by micro-indentation. The effective elastic modulus was calculated by fitting the experimental curve with the Johnson-Kendall-Robert (JKR) contact mechanics model considering a large pull-off force (adhesion) observed in detachment. The contact force,  $P$ , is related to the contact radius,  $a$ , by following the expression:

$$a^3 = \frac{3R}{4E_{eff}} \left( F + 3\gamma\pi R + \sqrt{6\gamma\pi RP + (3\gamma\pi R)^2} \right) \quad (S1)$$

where  $\gamma$  is the surface energy and  $R$  is the tip radius. The contact depth,  $\delta$ , is related to the contact radius,  $a$ , by:<sup>39</sup>

$$\delta = \frac{a^2}{R} - \left( \frac{2\pi\gamma R}{E_{eff}} \right)^{1/2} \quad (S2)$$

**Table S1.** Summary of glass transition temperatures of pure PEGDA and PEGDMA polymers and their copolymers with different PEGDA contents.

| Polymer Composition | $T_g$ (°C) |
|---------------------|------------|
| PEGDA               | -5         |
| 67% PEGDA           | -21        |
| 50% PEGDA           | -28        |
| 25% PEGDA           | -47        |
| 17% PEGDA           | -47        |
| PEGDMA              | -53        |

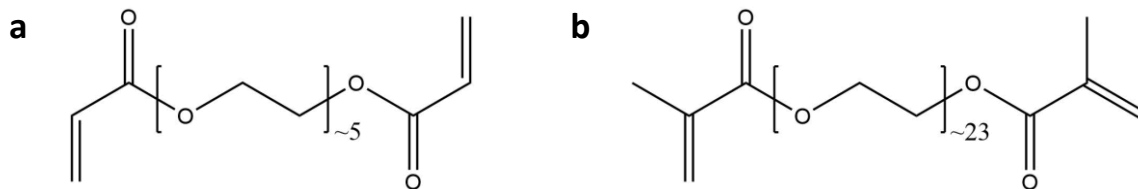

**Figure S1.** Molecular structures of a) PEGDA (MW ~ 200 g/mol) and b) PEGDMA (MW ~ 1000 g/mol) oligomers.

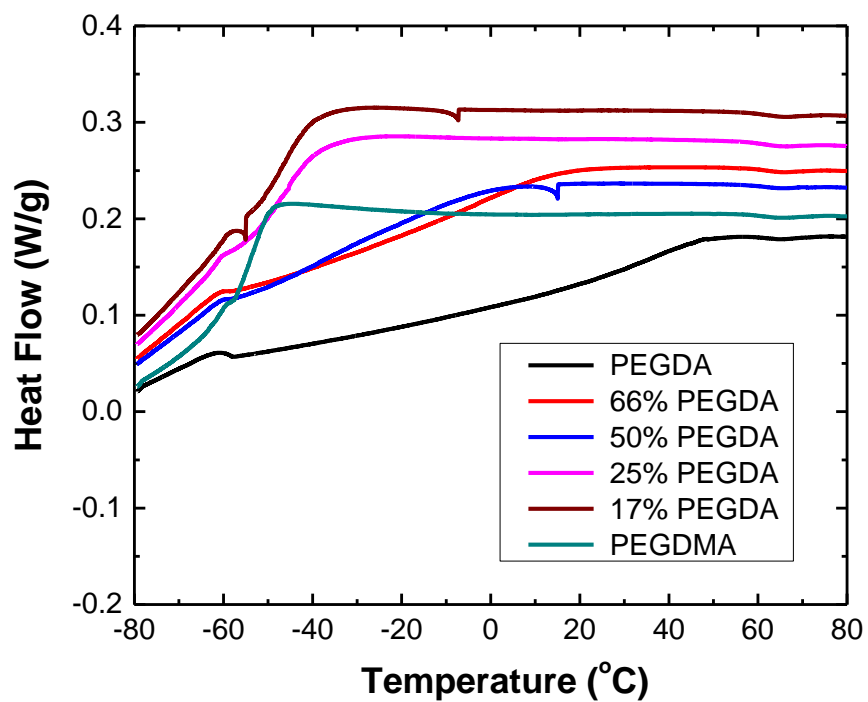

**Figure S2.** Typical DSC plots of pure PEGDA and PEGDMA polymers and their copolymers with different PEGDA contents.

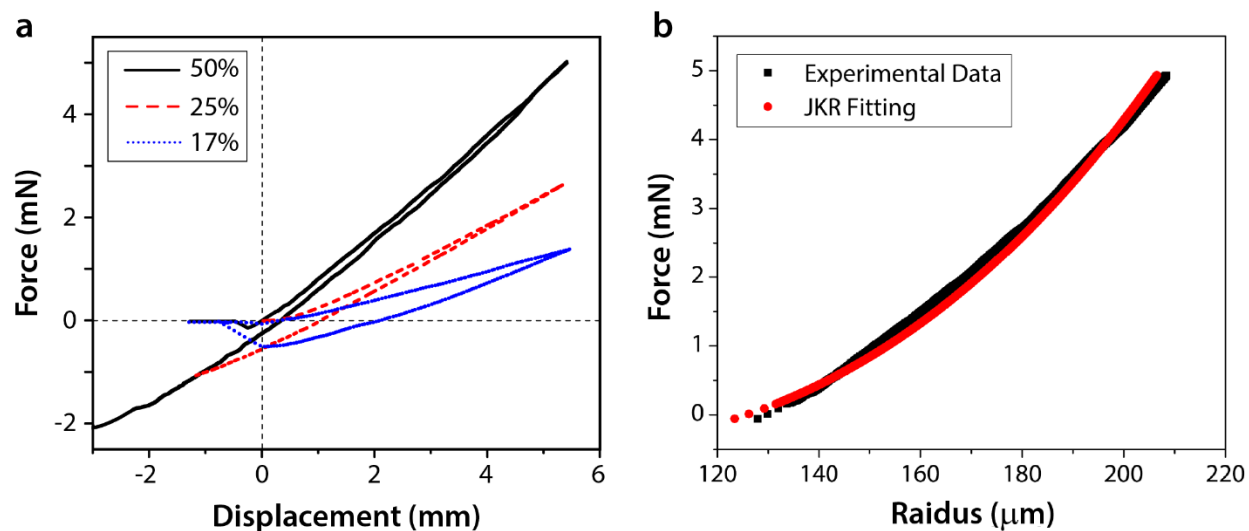

**Figure S3.** a) Typical indentation force-displacement curves of the indentation on PSMPCs comprising 50%, 25%, and 17% PEGDA. b) JKR model fits well on the loading portion of the indentation curve of the PSMPC containing 50% PEGDA.

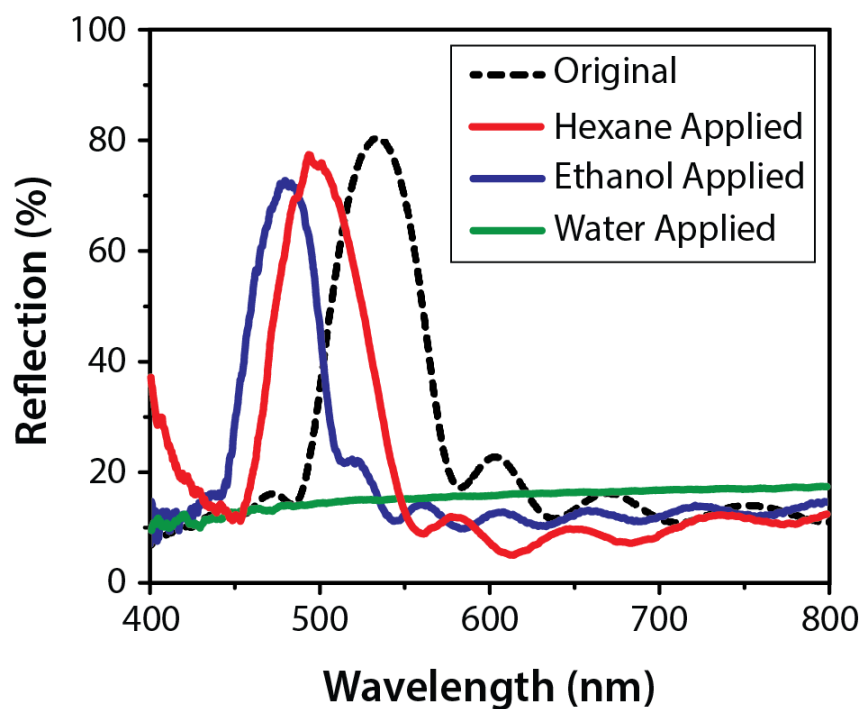

**Figure S4.** Normal-incidence optical reflection spectra obtained from a pure PEGDA PSMPC (labeled as Original) and a PSMPC comprising 33% PEGDA dried out from liquid hexane, ethanol, and water, respectively.
